# Supplementary material for: Replicable in vivo physiological and behavioral phenotypes of the Shank3B null mutant mouse model of autism
Source: Springer Nature journal article supplement (doi:10.1186/s13229-017-0142-z), 2017-06-15
Supplement: MOESM2 [file 12448284]

**Figure S2**

**EEG low frequency power spectral analysis**

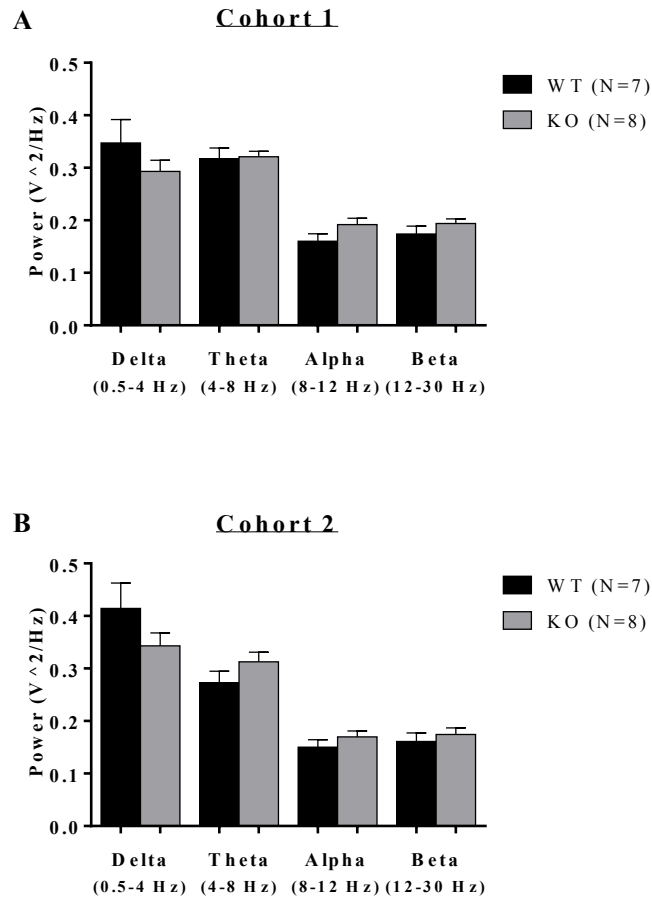

Figure S2. EEG low frequency power spectral analysis.

Spectral analysis of the one hour pre-PTZ EEG exhibits similar power in the delta (0.5-4 Hz), theta (4-8 Hz), alpha (8-12 Hz), and beta (12-30 Hz) frequency bands in Shank3B knockout (KO) relative to wildtypes (WT). These results were replicable in both cohorts. (A) Cohort 1, (B) Cohort 2.
